# Supplementary material for: Genomic and functional analysis of Romboutsia ilealis CRIB T reveals adaptation to the small intestine
Source: PeerJ journal article supplement (doi:10.7717/peerj.3698), 2017-09-11

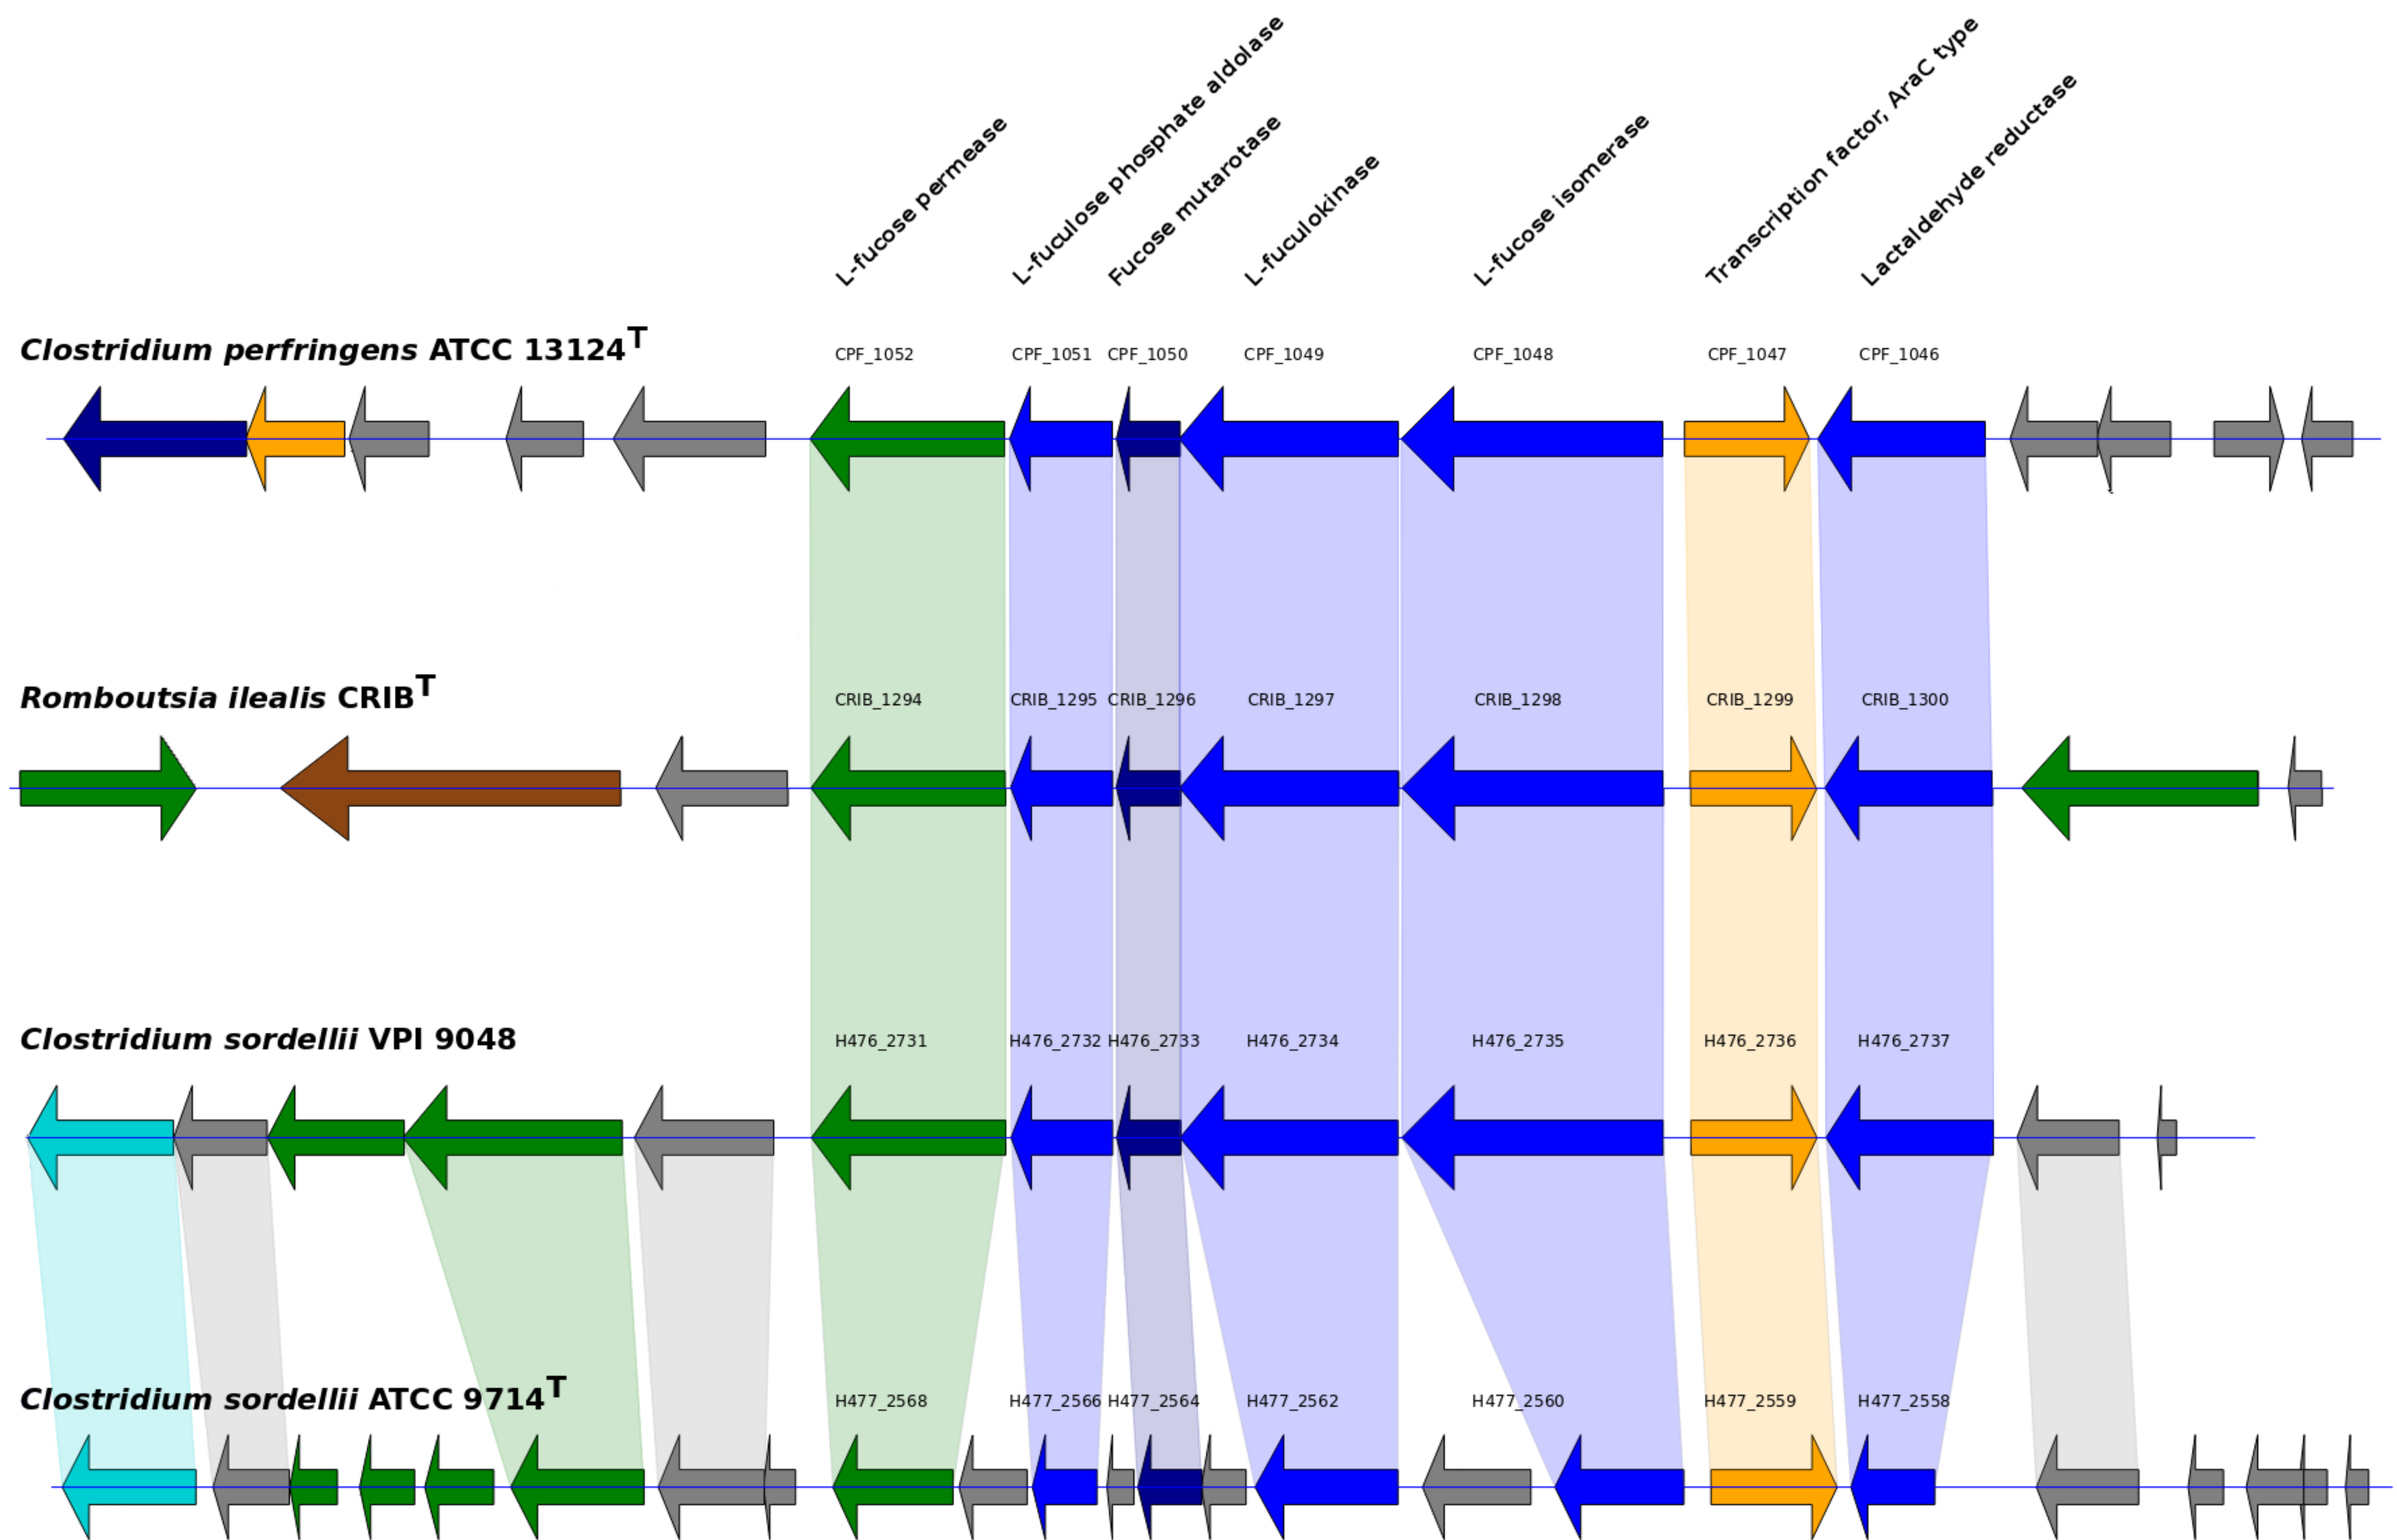

Supplement: FigureS2_SuppInfo.pdf [file FigureS2_SuppInfo.pdf]
