# Supplementary material for: Genomic and functional analysis of Romboutsia ilealis CRIB T reveals adaptation to the small intestine
Source: PeerJ journal article supplement (doi:10.7717/peerj.3698), 2017-09-11

Urease accessory proteins    Urea channel    Urease subunits

ureH    ureG    ureF    ureE    ureI    α    β/γ

*Helicobacter pylori* 26695

HP\_0067    HP\_0068    HP\_0069    HP\_0070    HP\_0071    HP\_0072    HP\_0073

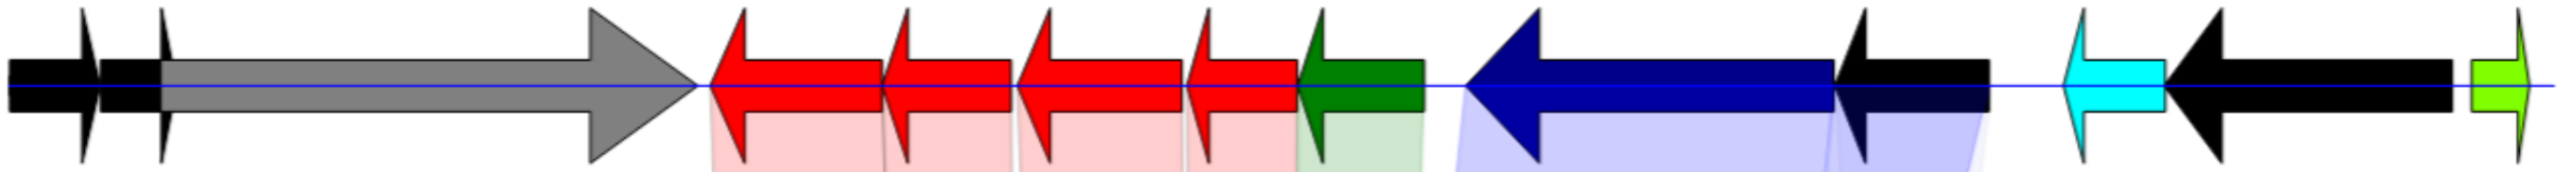

*Romboutsia ilealis* CRIB $\tau$

CRIB\_1381    CRIB\_1382    CRIB\_1383    CRIB\_1384    CRIB\_1385    CRIB\_1386    CRIB\_1387    CRIB\_1388

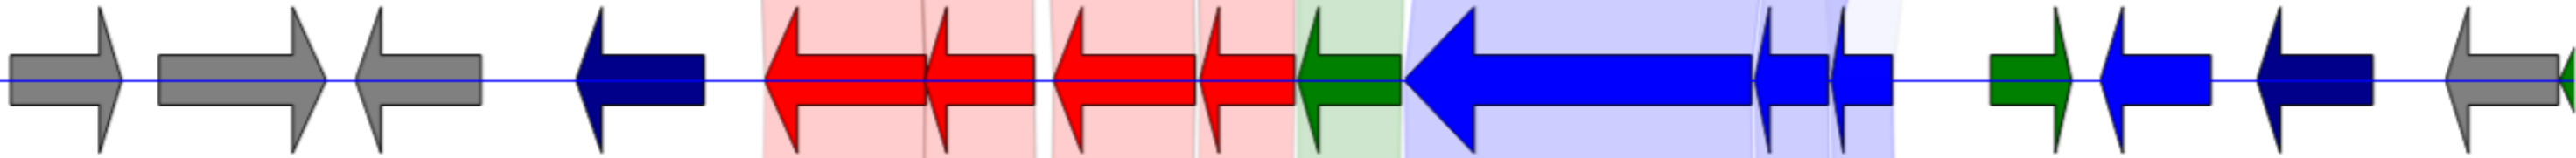

*Clostridium sordellii* VPI 9048

H476\_2649    H476\_2650    H476\_2651    H476\_2652    H476\_2653    H476\_2654    H476\_2655    H476\_2656

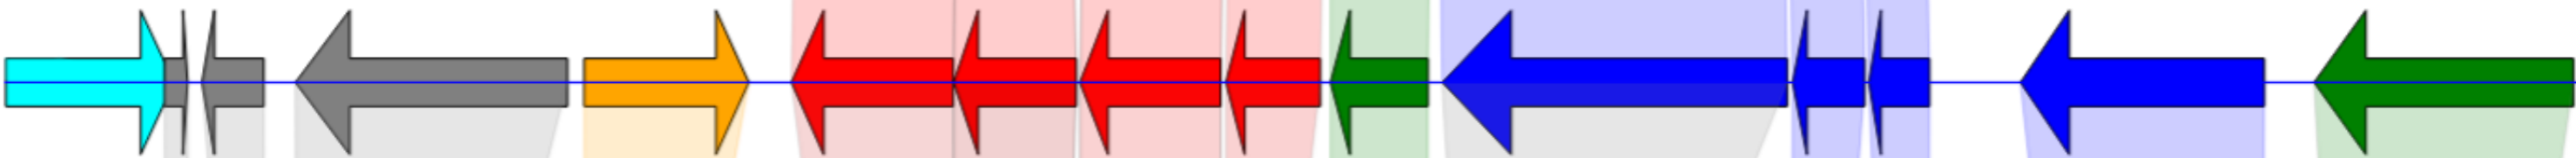

*Clostridium sordellii* ATCC 9714 $\tau$

H477\_4336    H477\_4337    H477\_4338    H477\_4339    H477\_4341    H477\_4343    H477\_4346    H477\_4347

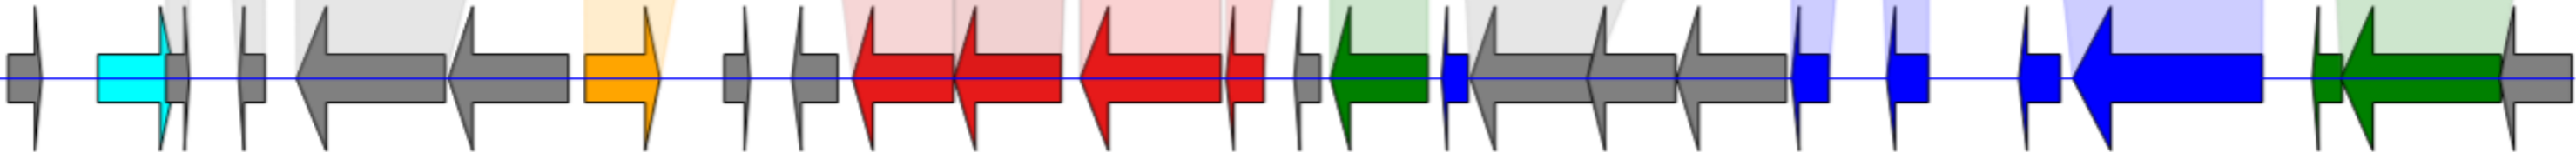

Supplement: FigureS3_SuppInfo.pdf [file FigureS3_SuppInfo.pdf]
