# Supplementary material for: Genomic and functional analysis of Romboutsia ilealis CRIBT reveals adaptation to the small intestine
Source: PeerJ. 2017 Sep 11;5:e3698. doi: 10.7717/peerj.3698 (PMC5598433; doi:10.7717/peerj.3698)
Supplement: Table S1 [file peerj-05-3698-s005.xlsx]

## Sheet: Sheet1
	Mid-exponential phase		Stationary phase
	(~8-10h)		(24h)
	OD600nm	pH	OD600nm	pH
Glucose 1	0.595	6.99	1.168	6.19
Glucose 2	0.585	6.95	1.072	6.26
Glucose 3	0.56	6.92	0.992	6.11
Average	0.58	6.95	1.077	6.19
FOS 1	0.492	6.9	1.149	6.37
FOS 2	0.55	6.89	1.079	6.26
FOS 3	0.526	6.9	1.069	6.33
Average	0.523	6.9	1.099	6.32
L-fucose 1	0.547	6.94	0.71	6.31
L-fucose 2	0.52	6.93	0.61	6.37
L-fucose 3	0.563	6.87	0.618	6.36
Average	0.543	6.91	0.646	6.35
Control 1 ( preconditioned on glucose)	0.315	6.94	0.358	6.88
Control 2 ( preconditioned on FOS)	0.403	6.98	0.33	6.97
Control 3 ( preconditioned on L-fucose)	0.413	6.97	0.367	6.93
Average	0.377	6.96	0.352	6.93
Table S1. Growth characteristics of the individual cultures used for whole-genome transcriptome analysis of R. ilealis CRIBT grown in four experimental conditions.
