# Supplementary material for: Genomic and functional analysis of Romboutsia ilealis CRIBT reveals adaptation to the small intestine
Source: PeerJ. 2017 Sep 11;5:e3698. doi: 10.7717/peerj.3698 (PMC5598433; doi:10.7717/peerj.3698)
Supplement: Table S2 [file peerj-05-3698-s006.xlsx]

## Sheet: Sheet1
	Glucose			FOS			L-Fucose			Control
	1	2	3	1	2	3	1	2	3	1 (glucose)	2 (FOS)	3 (L-fucose)
Total no. of reads	15574335	11030037	15657610	12652647	11948224	14122138	14215916	15527737	9086655	15522354	13691129	10221853
Total no. of rRNA reads	1724209	599335	108411	933615	2444855	2337475	2689251	1115485	5677746	1085502	160691	382228
Percentage of rRNA reads	11	5	1	7	20	17	19	7	62	7	1	4
Total no. of reads after rRNA removal	13850126	10430702	15549199	11719032	9503369	11784663	11526665	14412252	3408909	14436852	13530438	9839625
Total no. of bases removed as adapters	526331427	232474074	495884518	353295955	285235443	338892680	360471843	559814123	124300857	461476164	443584851	223111337
Percentage of bases removed as adapters	25	15	21	20	20	19	21	26	24	21	22	15
Total no. of reads after quality filtering	12893890	9797525	14588980	10910861	8795679	11023854	10769006	13474757	3124596	13550929	12531571	9261668
Percentage of reads that passed quality filtering	93	94	94	93	93	94	93	94	92	94	93	94
Mean length of reads that passed quality filtering	112	127	118	120	121	121	119	111	115	118	118	127
Percentage of initial bases after all filtering steps	62	75	73	69	59	63	60	64	26	69	72	77
Total no. of reads mapped to the genome	12660782	9663639	14374304	10747772	8607651	10832643	10545697	13067619	2990835	13347802	12228370	9128748
Percentage of reads mapping to the genome	98	99	99	99	98	98	98	97	96	99	98	99
Table S2. Summary of the RNA-seq raw data analysis for whole-genome transcriptome analysis of R. ilealis CRIBT grown in four experimental conditions.
