# Supplementary material for: Genomic and functional analysis of Romboutsia ilealis CRIBT reveals adaptation to the small intestine
Source: PeerJ. 2017 Sep 11;5:e3698. doi: 10.7717/peerj.3698 (PMC5598433; doi:10.7717/peerj.3698)
Supplement: Table S3 — These three conditions included L-fucose, control (absence of additional carbon source) and FOS. Differential gene expression values that did not meet the criteria for significance (≥1.5 log2(fold change) and q value ≤0.05) are color-coded in dark-grey. [file peerj-05-3698-s007.xlsx]

## Sheet: Sheet1
			Glucose vs L-fucose		Glucose vs control		Glucose vs FOS
	locus	annotation	log2 (fold change)	q value	log2 (fold change)	q value	log2 (fold change)	q value
1	CRIB_2231	Aldehyde-alcohol dehydrogenase 2	3.9	0.0003	3.17	0.0002	0.76	0.3131
2	CRIB_2018	PTS system glucose-specific EIIA component	3.74	0.0003	2.89	0.0002	1.58	0.0018
3	CRIB_2017	PTS system glucose-specific EIIBC component	3.33	0.0003	2.54	0.0002	1.31	0.0018
4	CRIB_2019	Transcription antiterminator LicT	3.06	0.0003	2.58	0.0002	1.11	0.0018
5	CRIB_877	c-di-GMP-I	2.63	0.0003	0.86	0.0101	-0.1	0.7471
6	CRIB_1635	FeoA domain	2.48	0.0003	1.71	0.0002	1.53	0.0018
7	CRIB_186	Central glycolytic genes regulator	2.48	0.0003	3.76	0.0002	1.03	0.02
8	CRIB_934	Rhodanese-like protein	2.31	0.0003	2.65	0.0002	1.32	0.0018
9	CRIB_1634	Ferrous iron transport protein B	2.09	0.0003	0.89	0.0152	0.85	0.0338
10	CRIB_187	Glyceraldehyde-3-phosphate dehydrogenase	2.05	0.0003	3.45	0.0002	0.6	0.2333
11	CRIB_2505	Protein translocase subunit SecY	2.05	0.0003	2.2	0.0002	0.53	0.279
12	CRIB_601	RNA polymerase sigma-70 factor	2	0.0003	-0.99	0.0224	-3.58	0.0018
13	CRIB_2506	Adenylate kinase	2	0.0003	2.28	0.0002	0.68	0.2158
14	CRIB_2507	Methionine aminopeptidase 1	2	0.0003	2.28	0.0002	0.68	0.2158
15	CRIB_439	PF09924 protein	1.99	0.0003	2.17	0.0002	0.81	0.0219
16	CRIB_2510	30S ribosomal protein S13	1.98	0.0003	2.02	0.0002	0.83	0.0682
17	CRIB_2038	Heme oxygenase	1.98	0.0003	0.14	0.6834	0.51	0.1518
18	CRIB_472	YqzL-like protein	1.97	0.0003	1.93	0.0002	0.74	0.0514
19	CRIB_473	DNA repair protein RecO	1.97	0.0003	1.93	0.0002	0.74	0.0514
20	CRIB_474	Domain of unknown function (DUF4342)	1.97	0.0003	1.93	0.0002	0.74	0.0514
21	CRIB_2369	Veg protein	1.91	0.0003	0.8	0.0202	-0.07	0.8691
22	CRIB_2492	50S ribosomal protein L16	1.89	0.0006	2.57	0.0002	1.1	0.0611
23	CRIB_2496	50S ribosomal protein L24	1.88	0.0003	2.48	0.0002	0.83	0.1008
24	CRIB_2486	50S ribosomal protein L4	1.88	0.0094	2.19	0.0006	0.66	0.4126
25	CRIB_2487	50S ribosomal protein L23	1.88	0.0094	2.19	0.0006	0.66	0.4126
26	CRIB_1247	Arsenate reductase	1.88	0.0003	1.28	0.0002	0.64	0.0267
27	CRIB_2511	30S ribosomal protein S11	1.86	0.0014	2.35	0.0002	1.01	0.083
28	CRIB_1457	Sodium/alanine symporter	1.86	0.0003	1.5	0.0002	0.61	0.091
29	CRIB_895	Ferric anguibactin-binding protein	1.83	0.0003	0.47	0.2352	0.58	0.2159
30	CRIB_797	Protein of unknown function (DUF1659)	1.83	0.0003	1.56	0.0002	0.47	0.1254
31	CRIB_197	tmRNA	1.82	0.0061	0.74	0.1741	-0.09	0.9173
32	CRIB_470	GTPase Era	1.82	0.0003	2.07	0.0002	0.74	0.0357
33	CRIB_796	Protein of unknown function (DUF2922)	1.81	0.0003	1.51	0.0002	0.83	0.0081
34	CRIB_2043	T-box	1.81	0.0003	0.59	0.0308	0.36	0.2102
35	CRIB_1596	Transporter	1.8	0.0003	1.6	0.0002	0.27	0.301
36	CRIB_935	TVP38/TMEM64 inner membrane protein YdjZ	1.8	0.0003	2.62	0.0002	0.79	0.009
37	CRIB_2509	Ribosomal protein L36p	1.79	0.0003	2.27	0.0002	0.91	0.0056
38	CRIB_2501	50S ribosomal protein L18	1.78	0.0003	2.24	0.0002	0.83	0.0815
39	CRIB_892	Ferric anguibactin transport system permease	1.77	0.0003	0.5	0.2183	0.2	0.6777
40	CRIB_893	Ferric anguibactin transport system permease	1.77	0.0003	0.5	0.2183	0.2	0.6777
41	CRIB_894	Iron(3+)-hydroxamate import ATP-binding protein	1.77	0.0003	0.5	0.2183	0.2	0.6777
42	CRIB_634	Uncharacterized BCR, YitT family COG1284	1.76	0.0003	1.34	0.0002	0.29	0.3278
43	CRIB_1470	Hypothetical protein	1.76	0.0003	1.87	0.0002	1.25	0.0018
44	CRIB_2102	Preprotein translocase, subunit YajC	1.73	0.0003	1.51	0.0002	0.89	0.009
45	CRIB_1862	Branched-chain amino acid transport system carrier	1.72	0.0003	0.72	0.0437	0.42	0.2765
46	CRIB_2079	Hypothetical protein	1.72	0.0003	0.93	0.0002	0.77	0.0081
47	CRIB_2493	Ribosomal protein L29p/L35e	1.7	0.0003	1.98	0.0002	0.45	0.1474
48	CRIB_255	Iron compound ABC transporter, iron	1.7	0.001	0.59	0.1873	0.91	0.0964
49	CRIB_1864	50S ribosomal protein L19	1.69	0.0003	1.66	0.0002	0.68	0.1518
50	CRIB_2485	50S ribosomal protein L3	1.68	0.001	2.15	0.0002	0.48	0.3819
51	CRIB_2503	Ribosomal protein L30p/L7e	1.67	0.0003	1.88	0.0002	0.66	0.0289
52	CRIB_2192	Ribosomal protein L35	1.67	0.0003	1.65	0.0002	0.85	0.0244
53	CRIB_2490	50S ribosomal protein L22	1.66	0.0006	2.36	0.0002	0.67	0.1723
54	CRIB_2508	Translation initiation factor IF-1	1.65	0.0003	1.39	0.0002	0.13	0.6697
55	CRIB_2139	DEAD-box ATP-dependent RNA helicase CshA	1.65	0.0003	2.11	0.0002	0.99	0.0154
56	CRIB_2372	SEC-C domain protein	1.64	0.0003	1.85	0.0002	1.11	0.0018
57	CRIB_2441	tRNA-specific adenosine deaminase	1.62	0.0003	1.49	0.0002	1.14	0.0018
58	CRIB_2513	DNA-directed RNA polymerase subunit alpha	1.61	0.0012	1.56	0.0002	0.5	0.3046
59	CRIB_1253	L-cystine uptake protein TcyP	1.61	0.0003	1.51	0.0002	0.28	0.3861
60	CRIB_2491	30S ribosomal protein S3	1.61	0.0034	2.25	0.0002	0.87	0.1366
61	CRIB_437	UBA/THIF-type NAD/FAD binding protein	1.61	0.0003	1.7	0.0002	0.43	0.1474
62	CRIB_2494	Ribosomal protein S17p/S11e	1.6	0.0006	1.91	0.0002	0.48	0.2686
63	CRIB_2489	30S ribosomal protein S19	1.59	0.0003	1.76	0.0002	0.2	0.6029
64	CRIB_2499	30S ribosomal protein S8	1.59	0.0016	2.28	0.0002	0.62	0.2219
65	CRIB_890	Protein of unknown function (DUF3793)	1.58	0.0003	0.63	0.0134	0.49	0.0834
66	CRIB_2497	50S ribosomal protein L5	1.58	0.0016	2.08	0.0002	0.61	0.2193
67	CRIB_182	Small acid-soluble spore protein	1.57	0.0003	2.67	0.0002	1.25	0.0018
68	CRIB_183	Methyltransferase domain protein	1.57	0.0003	2.67	0.0002	1.25	0.0018
69	CRIB_1812	Ribosome maturation factor RimP	1.57	0.0003	1.68	0.0002	0.69	0.0313
70	CRIB_1595	Tubulin/FtsZ, C-terminal	1.57	0.0003	1.52	0.0002	0.5	0.0928
71	CRIB_1352	Radical SAM domain protein	1.57	0.0003	0.85	0.0153	0.93	0.0056
72	CRIB_2495	50S ribosomal protein L14	1.56	0.0028	2.49	0.0002	1.03	0.0566
73	CRIB_2069	Sugar transferase	1.55	0.0003	1.26	0.0002	0.76	0.027
74	CRIB_2498	Ribosomal protein S14	1.55	0.0003	2.1	0.0002	0.77	0.0275
75	CRIB_1633	Virus attachment protein p12 family	1.53	0.0059	-0.07	0.872	-0.37	0.3511
76	CRIB_471	Magnesium transporter MgtE	1.52	0.0003	1.58	0.0002	0.64	0.0663
77	CRIB_2425	Ribosomal protein L34p	1.51	0.0003	0.87	0.0144	0.6	0.1137
78	CRIB_2407	Single-stranded DNA-binding protein	1.51	0.0016	1.63	0.0002	0.85	0.0882
79	CRIB_2450	Protein of unknown function (DUF2508)	1.5	0.0006	1.59	0.0002	0.26	0.4135
80	CRIB_436	3D domain protein	1.5	0.0003	1.66	0.0002	0.37	0.2266
81	CRIB_1735	Hypothetical protein	1.5	0.0003	1.66	0.0002	0.83	0.0018
82	CRIB_2408	30S ribosomal protein S6	1.49	0.0003	1.69	0.0002	0.85	0.0256
83	CRIB_188	Phosphoglycerate kinase	1.49	0.0014	2.88	0.0002	0.65	0.1607
84	CRIB_2488	50S ribosomal protein L2	1.48	0.003	2.19	0.0002	0.6	0.2694
85	CRIB_2520	30S ribosomal protein S9	1.48	0.0016	1.72	0.0002	1.04	0.0308
86	CRIB_2347	glmS	1.46	0.0003	1.86	0.0002	0.9	0.0018
87	CRIB_2500	50S ribosomal protein L6	1.44	0.0033	2.06	0.0002	0.62	0.226
88	CRIB_2476	50S ribosomal protein L10	1.43	0.0006	1.56	0.0002	0.2	0.6297
89	CRIB_190	2,3-bisphosphoglycerate-independent	1.43	0.0029	2.84	0.0002	0.63	0.197
90	CRIB_2512	30S ribosomal protein S4	1.43	0.0012	1.75	0.0002	0.51	0.273
91	CRIB_191	Enolase	1.42	0.0029	2.44	0.0002	0.69	0.2212
92	CRIB_2502	30S ribosomal protein S5	1.41	0.0034	2.28	0.0002	0.84	0.0867
93	CRIB_1674	30S ribosomal protein S2	1.4	0.0019	1.63	0.0002	0.78	0.1
94	CRIB_2337	S-adenosylmethionine synthase	1.4	0.0042	1.94	0.0002	0.79	0.1037
95	CRIB_2504	50S ribosomal protein L15	1.4	0.0029	2.14	0.0002	0.89	0.0636
96	CRIB_2480	30S ribosomal protein S12	1.39	0.003	1.55	0.0002	0.62	0.1874
97	CRIB_2514	50S ribosomal protein L17	1.39	0.004	1.78	0.0002	0.78	0.0982
98	CRIB_1403	Hypothetical protein	1.38	0.0006	1.6	0.0002	0.72	0.0358
99	CRIB_136	SEC-C motif-containing protein	1.36	0.0003	1.56	0.0002	0.8	0.0154
100	CRIB_424	T-box	1.34	0.0003	1.73	0.0002	1.18	0.0018
101	CRIB_1834	Metallo beta-lactamase superfamily protein	1.34	0.0032	1.56	0.0002	0.89	0.0466
102	CRIB_365	Catabolite control protein A	1.32	0.0003	1.84	0.0002	0.64	0.0414
103	CRIB_2484	30S ribosomal protein S10	1.32	0.0016	2.13	0.0002	0.68	0.0956
104	CRIB_1932	RNA methyltransferase, RsmD	1.3	0.0003	1.69	0.0002	0.83	0.0056
105	CRIB_2519	50S ribosomal protein L13	1.3	0.0045	1.93	0.0002	1.03	0.0335
106	CRIB_2428	S4 domain-containing protein	1.29	0.0003	1.57	0.0002	0.66	0.029
107	CRIB_957	Transcriptional regulator, ArsR	1.28	0.0003	1.54	0.0002	0.08	0.7861
108	CRIB_2348	Phosphoglucosamine mutase	1.28	0.004	1.84	0.0002	1.08	0.0224
109	CRIB_1621	GTP-binding protein TypA/BipA homolog	1.27	0.0045	1.79	0.0002	0.54	0.2239
110	CRIB_1764	CBS domain protein	1.27	0.0003	1.58	0.0002	0.55	0.0558
111	CRIB_1702	Small-conductance mechanosensitive channel	1.27	0.0003	1.87	0.0002	0.67	0.0178
112	CRIB_1842	Alanine--tRNA ligase	1.27	0.0006	1.68	0.0002	0.64	0.083
113	CRIB_1912	Exodeoxyribonuclease 7 large subunit	1.24	0.0019	1.66	0.0002	0.59	0.1461
114	CRIB_1913	O-sialoglycoprotein endopeptidase, peptidase M22	1.24	0.0019	1.66	0.0002	0.59	0.1461
115	CRIB_1914	Transcription termination protein, NusB	1.24	0.0019	1.66	0.0002	0.59	0.1461
116	CRIB_2090	D-tyrosyl-tRNA(Tyr) deacylase	1.22	0.0003	1.54	0.0002	0.42	0.1564
117	CRIB_2235	Conserved domain protein	1.22	0.0003	1.55	0.0002	0.45	0.1518
118	CRIB_2390	Protein PhnA	1.22	0.0003	1.63	0.0002	0.58	0.0623
119	CRIB_308	UPF0371 protein CD630 08980	1.21	0.0003	1.66	0.0002	0.41	0.2239
120	CRIB_2344	UDP-N-acetylglucosamine 1-carboxyvinyltransferase	1.19	0.0021	1.5	0.0002	0.47	0.2142
121	CRIB_189	Triosephosphate isomerase	1.17	0.0026	2.44	0.0002	0.37	0.3088
122	CRIB_2400	Adenylosuccinate synthetase	1.16	0.0029	1.59	0.0002	0.74	0.0572
123	CRIB_2479	DNA-directed RNA polymerase subunit beta	1.16	0.0184	1.59	0.0002	0.5	0.3437
124	CRIB_1966	Isoleucine--tRNA ligase	1.14	0.0049	1.62	0.0002	0.55	0.173
125	CRIB_2475	L10_leader	1.14	0.0042	1.76	0.0002	0.4	0.226
126	CRIB_1664	Capsular polysaccharide biosynthesis)	1.14	0.0026	1.6	0.0002	0.56	0.0844
127	CRIB_2338	SAM	1.13	0.0329	2	0.0006	0.91	0.0405
128	CRIB_12	T-box	1.13	0.0014	1.56	0.0002	0.53	0.0818
129	CRIB_1271	ABC transporter F member 2	1.11	0.0003	1.53	0.0002	0.44	0.1342
130	CRIB_1978	PDZ domain protein	1.09	0.0006	1.67	0.0002	0.42	0.1858
131	CRIB_1673	Elongation factor Ts	1.08	0.0135	1.55	0.0002	0.76	0.0928
132	CRIB_2472	Transcription antitermination protein NusG	1.07	0.0085	1.58	0.0002	0.63	0.1223
133	CRIB_967	3-hydroxyacyl-[acyl-carrier-protein] dehydratase	1.07	0.0033	1.68	0.0002	0.73	0.0484
134	CRIB_961	Acyl carrier protein	1.05	0.0003	1.62	0.0002	0.6	0.0372
135	CRIB_1954	UPF0701 protein YloC	1.03	0.001	1.61	0.0002	0.57	0.0601
136	CRIB_2346	Glutamine--fructose-6-phosphate aminotransferase	1.02	0.0191	1.65	0.0002	0.74	0.1046
137	CRIB_1902	Thiamin pyrophosphokinase, catalytic region	1.01	0.0014	1.51	0.0002	0.62	0.0485
138	CRIB_2478	DNA-directed RNA polymerase subunit beta	1	0.0429	1.66	0.0002	0.5	0.3371
139	CRIB_969	Acetyl-CoA carboxylase, biotin carboxylase, subunit	0.99	0.0298	1.56	0.0002	0.72	0.1138
140	CRIB_970	Acetyl-CoA carboxylase, biotin carboxylase, subunit	0.99	0.0298	1.56	0.0002	0.72	0.1138
141	CRIB_1594	ATP-binding cassette sub- F member 2	0.98	0.0053	1.55	0.0002	0.25	0.4715
142	CRIB_1688	Sodium/amino acid symporter	0.97	0.0196	1.5	0.0002	-0.36	0.3828
143	CRIB_1952	DNA-directed RNA polymerase, omega subunit	0.93	0.0003	1.64	0.0002	0.83	0.0018
144	CRIB_2104	Hypothetical protein	0.92	0.001	1.55	0.0002	0.8	0.0065
145	CRIB_1953	Guanylate kinase	0.9	0.0066	1.81	0.0002	0.75	0.0268
146	CRIB_1677	DEAD-box ATP-dependent RNA helicase CshA	0.86	0.0021	1.5	0.0002	0.7	0.0159
147	CRIB_2470	Ribosomal protein L33p	0.85	0.0045	1.94	0.0002	0.47	0.1099
148	CRIB_2471	Preprotein translocase, SecE subunit	0.82	0.0122	1.63	0.0002	0.43	0.1698
149	CRIB_1730	KWG Leptospira	0.82	0.015	1.53	0.0002	0.45	0.1614
150	CRIB_2473	Ribosomal protein L11p/L12e	0.8	0.0451	1.56	0.0002	0.54	0.1647
151	CRIB_180	Glyoxalase protein	0.79	0.007	1.78	0.0002	0.75	0.0192
152	CRIB_184	33 kDa chaperonin	0.74	0.0316	2.53	0.0002	0.52	0.1242
153	CRIB_1876	Elongation factor P	0.72	0.0641	1.56	0.0002	1.16	0.0056
154	CRIB_1672	Uridylate kinase	0.7	0.0477	1.61	0.0002	0.87	0.02
155	CRIB_962	Enoyl-(acyl-carrier-protein) reductase	0.67	0.1648	1.6	0.0002	0.76	0.1351
156	CRIB_963	Malonyl CoA-acyl carrier protein transacylase	0.67	0.1648	1.6	0.0002	0.76	0.1351
157	CRIB_17	Ribosomal RNA small subunit methyltransferase A	0.65	0.0151	1.55	0.0002	0.57	0.0469
Table S3. Overview of the genes that were significantly upregulated during growth of R. ilealis CRIBT in the presence of glucose in comparison to at least one of the other three conditions [L-fucose, control (absence of additional carbon source) and FOS] as identified by RNA-seq analysis. Differential gene expression values that did not meet the criteria for significance (≥1.5 log2(fold change) a…
