# Supplementary material for: Genomic and functional analysis of Romboutsia ilealis CRIBT reveals adaptation to the small intestine
Source: PeerJ. 2017 Sep 11;5:e3698. doi: 10.7717/peerj.3698 (PMC5598433; doi:10.7717/peerj.3698)
Supplement: Table S4 — These conditions included glucose, L-fucose and control (absence of additional carbon source)]. Differential gene expression values that did not meet the criteria for significance (≥1.5 log2(fold change) and q value ≤0.05) are color-coded in dark-grey. [file peerj-05-3698-s008.xlsx]

## Sheet: Sheet1
			FOS vs glucose		FOS vs L-fucose		FOS vs control
	locus tag	annotation	log2 (fold change)	q value	log2 (fold change)	q value	log2 (fold change)	q value
1	CRIB_603	Nucleic-acid-binding protein containing Zn-ribbon	4.12	0.0018	4.51	0.0007	2.59	0.0005
2	CRIB_602	Hypothetical protein	3.88	0.0018	5.34	0.0007	2.81	0.0005
3	CRIB_601	RNA polymerase sigma-70 factor	3.58	0.0018	5.6	0.0007	2.61	0.0005
4	CRIB_150	ABC transporter, substrate-binding protein	2.99	0.0018	2.01	0.0007	2.12	0.0005
5	CRIB_151	ß-fructofuranosidase	2.79	0.0018	1.99	0.0007	2.21	0.0005
6	CRIB_1461	PTS system sucrose-specific EIIBC component	2.74	0.0018	1.74	0.0007	1.69	0.0005
7	CRIB_149	Protein LplC	2.69	0.0018	1.73	0.0007	1.68	0.0005
8	CRIB_152	Fructokinase-2	2.64	0.0018	1.81	0.0007	1.88	0.0005
9	CRIB_148	Protein LplB	2.53	0.0018	1.56	0.0007	1.69	0.0005
10	CRIB_1458	Fructokinase-2	2.32	0.0018	1.61	0.0007	1.47	0.0005
11	CRIB_1509	Transcriptional regulator, GntR family	1.86	0.0018	2.21	0.0007	2.31	0.0005
15	CRIB_1508	ABC transporter related protein	1.65	0.0018	1.09	0.0007	1.12	0.0005
14	CRIB_1507	ABC transporter, permease protein	1.65	0.0018	1.09	0.0007	1.12	0.0005
16	CRIB_1459	RDD family protein	1.55	0.0018	0.7	0.0148	0.72	0.0065
17	CRIB_1460	ß-fructofuranosidase	1.55	0.0018	0.7	0.0148	0.72	0.0065
18	CRIB_1506	P-loop containing nucleoside triphosphate	1.52	0.0018	0.74	0.0035	0.88	0.0005
19	CRIB_2230	Hypothetical protein	0.56	0.0876	1.58	0.0007	1.4	0.0005
20	CRIB_1633	Virus attachment protein p12 family	0.37	0.3511	1.92	0.0007	0.29	0.4432
21	CRIB_1688	Sodium/amino acid symporter	0.36	0.3828	1.35	0.0007	1.87	0.0005
22	CRIB_1729	LrgA family protein	0.11	0.7094	0.98	0.0007	1.57	0.0005
23	CRIB_877	c-di-GMP-I	0.1	0.7471	2.73	0.0007	0.92	0.0005
24	CRIB_612	FAD-dependent pyridine nucleotide-disulphide	0.1	0.8315	1.6	0.0007	0.18	0.6911
25	CRIB_197	tmRNA	0.09	0.9173	1.94	0.0007	0.85	0.0826
26	CRIB_2369	Veg protein	0.07	0.8691	1.99	0.0007	0.84	0.0165
27	CRIB_2508	Translation initiation factor IF-1	-0.13	0.6697	1.55	0.0007	1.26	0.0005
28	CRIB_892	Ferric anguibactin transport system permease	-0.2	0.6777	1.58	0.0007	0.28	0.5672
29	CRIB_893	Ferric anguibactin transport system permease	-0.2	0.6777	1.58	0.0007	0.28	0.5672
30	CRIB_894	Iron(3+)-hydroxamate import ATP-binding protein	-0.2	0.6777	1.58	0.0007	0.28	0.5672
31	CRIB_2489	30S ribosomal protein S19	-0.2	0.6029	1.41	0.0007	1.56	0.0005
32	CRIB_1596	Transporter	-0.27	0.301	1.55	0.0007	1.33	0.0005
33	CRIB_189	Triosephosphate isomerase	-0.37	0.3088	0.81	0.0426	2.07	0.0005
34	CRIB_2493	Ribosomal protein L29p/L35e	-0.45	0.1474	1.26	0.0007	1.53	0.0005
35	CRIB_2485	50S ribosomal protein L3	-0.48	0.3819	1.22	0.0219	1.67	0.0005
36	CRIB_184	33 kDa chaperonin	-0.52	0.1242	0.24	0.5266	2	0.0005
12	CRIB_2505	Protein translocase subunit SecY	-0.53	0.279	1.55	0.0007	1.67	0.0005
37	CRIB_187	Glyceraldehyde-3-phosphate dehydrogenase	-0.6	0.2333	1.47	0.0025	2.85	0.0005
38	CRIB_2488	50S ribosomal protein L2	-0.6	0.2694	0.9	0.1002	1.58	0.0005
39	CRIB_2499	30S ribosomal protein S8	-0.62	0.2219	0.99	0.0599	1.66	0.0005
40	CRIB_190	2,3-bisphosphoglycerate-independent	-0.63	0.197	0.82	0.1019	2.21	0.0005
41	CRIB_188	Phosphoglycerate kinase	-0.65	0.1607	0.87	0.0547	2.24	0.0005
43	CRIB_2487	50S ribosomal protein L23	-0.66	0.4126	1.24	0.1073	1.53	0.0106
42	CRIB_2486	50S ribosomal protein L4	-0.66	0.4126	1.24	0.1073	1.53	0.0106
44	CRIB_2490	50S ribosomal protein L22	-0.67	0.1723	1.02	0.0271	1.7	0.0005
45	CRIB_2506	Adenylate kinase	-0.68	0.2158	1.35	0.0064	1.61	0.0005
46	CRIB_2507	Methionine aminopeptidase 1	-0.68	0.2158	1.35	0.0064	1.61	0.0005
47	CRIB_191	Enolase	-0.69	0.2212	0.75	0.1675	1.75	0.0005
13	CRIB_2231	Aldehyde-alcohol dehydrogenase 2	-0.76	0.3131	3.17	0.0007	2.41	0.0005
48	CRIB_935	TVP38/TMEM64 inner membrane protein YdjZ	-0.79	0.009	1.02	0.0007	1.82	0.0005
49	CRIB_2496	50S ribosomal protein L24	-0.83	0.1008	1.08	0.0186	1.65	0.0005
50	CRIB_186	Central glycolytic genes regulator	-1.03	0.02	1.47	0.0007	2.73	0.0005
51	CRIB_2019	Transcription antiterminator LicT	-1.11	0.0018	1.97	0.0007	1.47	0.0005
52	CRIB_2017	PTS system glucose-specific EIIBC component	-1.31	0.0018	2.05	0.0007	1.24	0.0005
53	CRIB_2018	PTS system glucose-specific EIIA component	-1.58	0.0018	2.19	0.0007	1.31	0.0005
Table S4. Overview of the genes that were significantly upregulated during growth of R. ilealis CRIBT in the presence of FOS in comparison to at least one of the other three conditions [glucose, L-fucose and control (absence of additional carbon source)] as identified by RNA-seq analysis. Differential gene expression values that did not meet the criteria for significance (≥1.5 log2(fold change) a…
