# Supplementary material for: Genomic and functional analysis of Romboutsia ilealis CRIBT reveals adaptation to the small intestine
Source: PeerJ. 2017 Sep 11;5:e3698. doi: 10.7717/peerj.3698 (PMC5598433; doi:10.7717/peerj.3698)
Supplement: Table S5 — These conditions included glucose, FOS and control (absence of additional carbon source). Differential gene expression values that did not meet the criteria for significance (≥1.5 log2(fold change) and q value ≤0.05) are color-coded in dark-grey. [file peerj-05-3698-s009.xlsx]

## Sheet: Sheet1
			L-fucose vs glucose		L-fucose vs FOS		L-fucose vs control
	locus	annotation	log2 (fold change)	q value	log2 (fold change)	q value	log2 (fold change)	q value
1	CRIB_1298	L-fucose isomerase	6.71	0.0003	5.79	0.0008	4.64	0.0023
2	CRIB_1296	Fucose mutarotase	6.53	0.0003	5.7	0.0008	4.85	0.0023
3	CRIB_1297	Carbohydrate kinase, FFGY family	6.53	0.0003	5.7	0.0008	4.85	0.0023
4	CRIB_1295	L-fuculose phosphate aldolase	6.47	0.0003	5.6	0.0008	4.81	0.0023
5	CRIB_1300	Lactaldehyde reductase	6.37	0.0003	5.5	0.0008	4.48	0.0023
6	CRIB_1294	L-fucose permease	5.66	0.0003	5.05	0.0008	4.25	0.0023
7	CRIB_2242	Beta-N-acetylglucosaminidase/beta-glucosidase	3.5	0.0003	2.75	0.0008	-0.13	0.9987
8	CRIB_614	N-acetylneuraminate lyase	3.44	0.0003	2.75	0.0008	0.71	0.1206
9	CRIB_613	N-acetylmannosamine-6-phosphate 2-epimerase,	2.87	0.0003	2.24	0.0008	0.2	0.9465
10	CRIB_1299	Transcriptional regulator, AraC	2.74	0.0003	2.17	0.0008	0.58	0.0993
11	CRIB_426	L-threonine dehydratase catabolic TdcB	2.72	0.0003	2.05	0.0008	0.31	0.9509
12	CRIB_615	Sodium:solute symporter protein	2.69	0.0003	2.16	0.0008	0.62	0.2396
13	CRIB_616	YhcH/YjgK/YiaL protein	2.58	0.0003	1.95	0.0008	0.42	0.3907
14	CRIB_2011	Carbon starvation protein A	2.45	0.0003	1.72	0.0008	0.08	0.9987
15	CRIB_630	MgsA/globin-like domain-containing protein	2.33	0.0003	1.72	0.0008	-0.42	0.4253
16	CRIB_650	Altronate oxidoreductase	2.31	0.0003	1.65	0.0008	-0.11	0.9987
17	CRIB_651	Altronate hydrolase	2.31	0.0003	1.65	0.0008	-0.11	0.9987
18	CRIB_652	Uronate isomerase	2.29	0.0003	1.61	0.0008	-0.21	0.9804
19	CRIB_649	2-dehydro-3-deoxygluconokinase	2.13	0.0003	1.22	0.0008	-0.54	0.2557
20	CRIB_1439	Hypothetical protein	2.05	0.049	0.19	0.8672	-0.02	0.9987
21	CRIB_1429	Hypothetical protein	2.05	0.0434	0.33	0.6722	-0.2	0.9987
22	CRIB_756	Hypothetical protein	2.02	0.0073	1.1	0.0801	-0.45	0.8569
23	CRIB_1067	CRISPR-associated nuclease/helicase Cas3	1.96	0.0003	1.85	0.0008	0.4	0.7762
24	CRIB_1302	Hypothetical protein	1.93	0.0151	1.08	0.0865	0.38	0.942
25	CRIB_1776	Hypothetical protein	1.89	0.0295	0.29	0.6677	-0.13	0.9987
26	CRIB_1066	CRISPR-associated protein cas5	1.88	0.0003	1.89	0.0008	0.19	0.9332
27	CRIB_1696	Perfringolysin O regulator protein	1.88	0.0003	1.29	0.0008	-1.48	0.0023
28	CRIB_1070	CRISPR-associated endoribonuclease Cas2	1.88	0.0003	1.75	0.0008	0.26	0.7962
29	CRIB_1345	Protein of unknown function (DUF2922)	1.81	0.012	0.66	0.2731	-0.09	0.9987
30	CRIB_1064	CRISPR-associated cxxc cxxc protein Cst1	1.79	0.0003	1.84	0.0008	0.33	0.7732
31	CRIB_2244	Uronate isomerase	1.77	0.0003	0.46	0.2489	-1.07	0.051
32	CRIB_2246	2-keto-3-deoxygluconate kinase	1.75	0.0006	0.58	0.2627	-0.63	0.6516
33	CRIB_2247	4-Hydroxy-2-oxoglutarate aldolase /	1.75	0.0006	0.58	0.2627	-0.63	0.6516
34	CRIB_2248	Short-chain dehydrogenase/reductase SDR	1.75	0.0003	0.65	0.1444	-0.42	0.8356
35	CRIB_629	PTS system, lactose/cellobiose family IIC	1.7	0.0003	1.04	0.0008	-0.63	0.1052
36	CRIB_1398	Melibiose carrier protein	1.68	0.0003	0.99	0.0008	-0.15	0.974
37	CRIB_2245	Mannonate dehydratase	1.68	0.0003	0.46	0.3356	-0.67	0.5157
38	CRIB_1068	CRISPR-associated protein cas4	1.68	0.0003	1.46	0.0008	0.19	0.9678
39	CRIB_1069	CRISPR-associated endonuclease Cas1	1.68	0.0003	1.46	0.0008	0.19	0.9678
40	CRIB_1740	Hypothetical protein	1.65	0.0003	0.78	0.0611	0.07	0.9987
41	CRIB_810	Glycine/sarcosine/betaine reductase selenoprotein B	1.64	0.0003	0.95	0.0014	0.14	0.9928
42	CRIB_1065	Devr CRISPR-associated regulatory protein	1.63	0.0003	1.61	0.0008	0.23	0.9465
43	CRIB_1601	Beta-galactosidase	1.62	0.0003	0.87	0.006	-0.21	0.974
44	CRIB_1014	Hypothetical protein	1.53	0.0003	0.62	0.0563	0.36	0.7221
45	CRIB_1013	Antirepressor, phage associated	1.53	0.0003	1.23	0.0008	0.61	0.0753
46	CRIB_1063	CRISPR-associated protein cas6	1.52	0.0003	1.53	0.0008	0.1	0.9987
47	CRIB_1607	Glycoside-Pentoside-Hexuronide (GPH):cation	1.51	0.0003	0.59	0.0124	-0.56	0.1506
48	CRIB_809	PTS system, lactose/cellobiose-specific, IIC	1.5	0.0003	0.74	0.0008	0.07	0.9987
49	CRIB_807	PTS system, lactose/cellobiose-specific, IIA	1.5	0.0016	0.68	0.0975	0.34	0.8569
50	CRIB_937	Domain of Unknown Function (DUF1540)	1.5	0.0006	0.64	0.0624	-0.01	0.9987
51	CRIB_172	Hypothetical protein	1.12	0.0852	2	0.0339	0.69	0.7356
52	CRIB_2073	S-layer homoloy domain-containing protein	0.9	0.0427	2.37	0.0008	-0.02	0.9987
53	CRIB_1670	Hypothetical protein	0.56	0.046	1.08	0.0008	1.77	0.0023
54	CRIB_184	33 kDa chaperonin	-0.74	0.0316	-0.24	0.5265	1.76	0.0023
Table S5. Overview of the genes that were significantly upregulated during growth of R. ilealis CRIBT in the presence of L-fucose in comparison to at least one of the other three conditions [glucose, FOS and control (absence of additional carbon source)] as identified by RNA-seq analysis. Differential gene expression values that did not meet the criteria for significance (≥1.5 log2(fold change) a…
