# Supplementary material for: Genomic and functional analysis of Romboutsia ilealis CRIBT reveals adaptation to the small intestine
Source: PeerJ. 2017 Sep 11;5:e3698. doi: 10.7717/peerj.3698 (PMC5598433; doi:10.7717/peerj.3698)
Supplement: Table S6 — These conditions included glucose, FOS and L-fucose. Differential gene expression values that did not meet the criteria for significance (≥1.5 log2(fold change) and q value ≤0.05) are color-coded in dark-grey. [file peerj-05-3698-s010.xlsx]

## Sheet: Sheet1
			Control vs glucose		Control vs FOS		Control vs L-Fucose
	locus	annotation	log2 (fold change)	q value	log2 (fold change)	q value	log2 (fold change)	q value
1	CRIB_2242	Beta-N-acetylglucosaminidase/beta-glucosidase	3.59	0.0002	2.87	0.0005	0.13	0.9987
2	CRIB_1696	Perfringolysin O regulator protein	3.33	0.0002	2.76	0.0005	1.48	0.0023
3	CRIB_2244	Uronate isomerase	2.81	0.0002	1.52	0.0005	1.07	0.051
4	CRIB_630	MgsA/globin-like domain-containing protein	2.72	0.0002	2.13	0.0005	0.42	0.4253
5	CRIB_614	N-acetylneuraminate lyase	2.71	0.0002	2.04	0.0005	-0.71	0.1206
6	CRIB_649	2-dehydro-3-deoxygluconokinase	2.65	0.0002	1.76	0.0005	0.54	0.2557
7	CRIB_613	N-acetylmannosamine-6-phosphate 2-epimerase,	2.65	0.0002	2.04	0.0005	-0.2	0.9465
8	CRIB_2334	Ribosomal subunit interface protein	2.55	0.0002	2.62	0.0005	2.02	0.0023
9	CRIB_652	Uronate isomerase	2.46	0.0002	1.81	0.0005	0.21	0.9804
10	CRIB_756	Hypothetical protein	2.42	0.0007	1.53	0.0013	0.45	0.8569
11	CRIB_650	Altronate oxidoreductase	2.38	0.0002	1.75	0.0005	0.11	0.9987
12	CRIB_651	Altronate hydrolase	2.38	0.0002	1.75	0.0005	0.11	0.9987
13	CRIB_426	L-threonine dehydratase catabolic TdcB	2.37	0.0002	1.74	0.0005	-0.31	0.9509
14	CRIB_2246	2-keto-3-deoxygluconate kinase	2.35	0.0002	1.21	0.0029	0.63	0.6516
15	CRIB_2247	4-Hydroxy-2-oxoglutarate aldolase	2.35	0.0002	1.21	0.0029	0.63	0.6516
16	CRIB_2011	Carbon starvation protein A	2.35	0.0002	1.63	0.0005	-0.08	0.9987
17	CRIB_2245	Mannonate dehydratase	2.31	0.0002	1.12	0.0038	0.67	0.5157
18	CRIB_629	PTS system, lactose/cellobiose family IIC	2.31	0.0002	1.66	0.0005	0.63	0.1052
19	CRIB_633	PTS system, lactose/cellobiose family IIA	2.29	0.0002	2.51	0.0005	1.26	0.0023
20	CRIB_632	PTS system, lactose/cellobiose family IIB	2.28	0.0002	2.43	0.0005	1.05	0.0023
21	CRIB_1429	Hypothetical protein	2.23	0.0182	0.52	0.3587	0.2	0.9987
22	CRIB_616	YhcH/YjgK/YiaL protein	2.14	0.0002	1.53	0.0005	-0.42	0.3907
23	CRIB_2248	Short-chain dehydrogenase/reductase SDR	2.13	0.0002	1.06	0.0062	0.42	0.8356
24	CRIB_1299	Transcriptional regulator, AraC	2.13	0.0002	1.58	0.0005	-0.58	0.0993
25	CRIB_1298	L-fucose isomerase	2.06	0.0002	1.14	0.0005	-4.64	0.0023
26	CRIB_615	Sodium:solute symporter protein	2.05	0.0002	1.54	0.0005	-0.62	0.2396
27	CRIB_1607	Glycoside-Pentoside-Hexuronide (GPH):cation	2.04	0.0002	1.15	0.0005	0.56	0.1506
28	CRIB_1312	Glucuronide permease	1.98	0.0002	1.31	0.0005	0.54	0.5611
29	CRIB_1776	Hypothetical protein	1.98	0.011	0.41	0.4176	0.13	0.9987
30	CRIB_1704	Maltodextrin import ATP-binding protein MsmX	1.94	0.0002	1.26	0.0005	0.75	0.1076
31	CRIB_1451	Kae1-associated kinase Bud32	1.93	0.0002	1.78	0.0005	1.11	0.0023
32	CRIB_2281	Chaperone protein htpG	1.9	0.0002	0.68	0.0875	1.37	0.0141
33	CRIB_655	TRAP-type C4-dicarboxylate transport system, large	1.88	0.0002	1.09	0.0005	0.52	0.5738
34	CRIB_1300	Lactaldehyde reductase	1.87	0.0002	1.01	0.0005	-4.48	0.0023
35	CRIB_1345	Protein of unknown function (DUF2922)	1.87	0.0023	0.74	0.1094	0.09	0.9987
36	CRIB_2241	Conserved domain protein	1.84	0.0002	0.86	0.0046	0.67	0.2155
37	CRIB_2240	Beta-N-acetylglucosaminidase/beta-glucosidase	1.83	0.0002	0.81	0.0368	0.41	0.8569
38	CRIB_1510	RNA polymerase sigma factor RpoD	1.82	0.0002	1.48	0.0005	0.92	0.015
39	CRIB_2249	Glucuronide carrier protein homolog	1.81	0.0002	0.41	0.1967	0.63	0.2866
40	CRIB_1601	Beta-galactosidase	1.8	0.0002	1.08	0.0005	0.21	0.974
41	CRIB_654	TRAP-type C4-dicarboxylate transport system, small	1.8	0.0002	1	0.0005	0.56	0.2303
42	CRIB_1398	Melibiose carrier protein	1.79	0.0002	1.13	0.0005	0.15	0.974
43	CRIB_708	Cystathionine beta-lyase PatB	1.77	0.0002	1.51	0.0005	0.86	0.0192
44	CRIB_2138	spore_II_AA: anti-sigma F factor antagonist	1.75	0.0002	1.47	0.0005	0.82	0.0115
45	CRIB_978	Hypothetical protein	1.74	0.0015	0.67	0.0989	0.78	0.4437
46	CRIB_1275	Glucosamine-6-phosphate deaminase	1.73	0.0002	0.83	0.0013	0.93	0.0041
47	CRIB_171	Small acid-soluble spore protein	1.73	0.0002	1.1	0.0023	0.38	0.7973
48	CRIB_1384	Urease accessory protein UreE	1.67	0.0002	0.68	0.0134	0.45	0.5655
49	CRIB_1386	Urease subunit alpha	1.66	0.0002	0.76	0.0023	0.29	0.7662
50	CRIB_1296	Fucose mutarotase	1.66	0.0002	0.84	0.0029	-4.85	0.0023
51	CRIB_1297	Carbohydrate kinase, FFGY family	1.66	0.0002	0.84	0.0029	-4.85	0.0023
52	CRIB_1066	CRISPR-associated protein cas5	1.65	0.0002	1.69	0.0005	-0.19	0.9332
53	CRIB_1295	L-fuculose phosphate aldolase	1.65	0.0002	0.78	0.0005	-4.81	0.0023
54	CRIB_2314	Orotate phosphoribosyltransferase	1.62	0.0002	1.68	0.0005	1.21	0.0023
55	CRIB_554	Hypothetical protein	1.6	0.0002	1.48	0.0005	1.23	0.0041
56	CRIB_1321	Domain of unknown function (DUF3794)	1.58	0.0002	0.56	0.0378	0.23	0.9301
57	CRIB_1070	CRISPR-associated endoribonuclease Cas2	1.58	0.0002	1.49	0.0005	-0.26	0.7962
58	CRIB_1521	Protein of unknown function (DUF1659)	1.55	0.0067	0.73	0.1146	0.22	0.9987
59	CRIB_2413	Transcriptional regulator	1.55	0.0002	1.08	0.0005	0.47	0.4253
60	CRIB_1740	Hypothetical protein	1.55	0.0004	0.69	0.0355	-0.07	0.9987
61	CRIB_603	Nucleic-acid-binding protein containing Zn-ribbon	1.54	0.0002	-2.59	0.0005	1.92	0.0023
62	CRIB_1385	AmiS/UreI transporter	1.54	0.0002	1.01	0.0005	0.41	0.6212
63	CRIB_591	Extracellular solute-binding protein 1	1.53	0.0002	0.91	0.0005	0.47	0.4394
64	CRIB_1606	Beta-galactosidase BgaA	1.52	0.0002	0.87	0.0005	0.35	0.5924
65	CRIB_1067	CRISPR-associated nuclease/helicase Cas3	1.52	0.0002	1.44	0.0005	-0.4	0.7762
66	CRIB_1216	Cold shock protein	1.51	0.0035	0.73	0.0637	0.26	0.989
67	CRIB_1381	Urease accessory protein UreH	1.51	0.0002	0.74	0.0023	0.4	0.48
68	CRIB_1382	Urease accessory protein UreG	1.51	0.0002	0.74	0.0023	0.4	0.48
69	CRIB_1302	Hypothetical protein	1.51	0.0208	0.69	0.1623	-0.38	0.942
70	CRIB_1064	CRISPR-associated cxxc cxxc protein Cst1	1.41	0.0002	1.5	0.0005	-0.33	0.7732
71	CRIB_23	Stage V sporulation protein G, SpoVG	1.3	0.0002	1.77	0.0005	1.94	0.0023
72	CRIB_178	UPF0597 protein CD630 32320	1.26	0.0002	1.08	0.0038	1.61	0.0023
73	CRIB_602	Hypothetical protein	1.09	0.028	-2.81	0.0005	2.54	0.0023
74	CRIB_373	6S	1.04	0.0007	0.57	0.014	1.9	0.0023
75	CRIB_601	RNA polymerase sigma-70 factor	0.99	0.0218	-2.61	0.0005	3	0.0023
76	CRIB_2073	S-layer homoloy domain-containing protein	0.88	0.0344	2.38	0.0005	0.02	0.9987
77	CRIB_1690	Thioredoxin, possibly sporulation protein	0.24	0.4995	0.47	0.1949	1.65	0.0023
78	CRIB_1633	Virus attachment protein p12 family	0.07	0.8755	-0.29	0.4432	1.64	0.0192
79	CRIB_2038	Heme oxygenase	-0.14	0.6875	0.38	0.2749	1.88	0.0023
80	CRIB_877	c-di-GMP-I	-0.86	0.0084	-0.92	0.0005	1.82	0.0023
Table S6. Overview of the genes that were significantly upregulated during growth of R. ilealis CRIBT in basal medium in absence of an additional carbon source (control condition) in comparison to at least one of the other three conditions (glucose, FOS and L-fucose) as identified by RNA-seq analysis. Differential gene expression values that did not meet the criteria for significance (≥1.5 log2(f…
